# Supplementary material
Source: PubMed Central journal article supplement (PMC11031407)

Unprocessed western blot for Fig. 2e

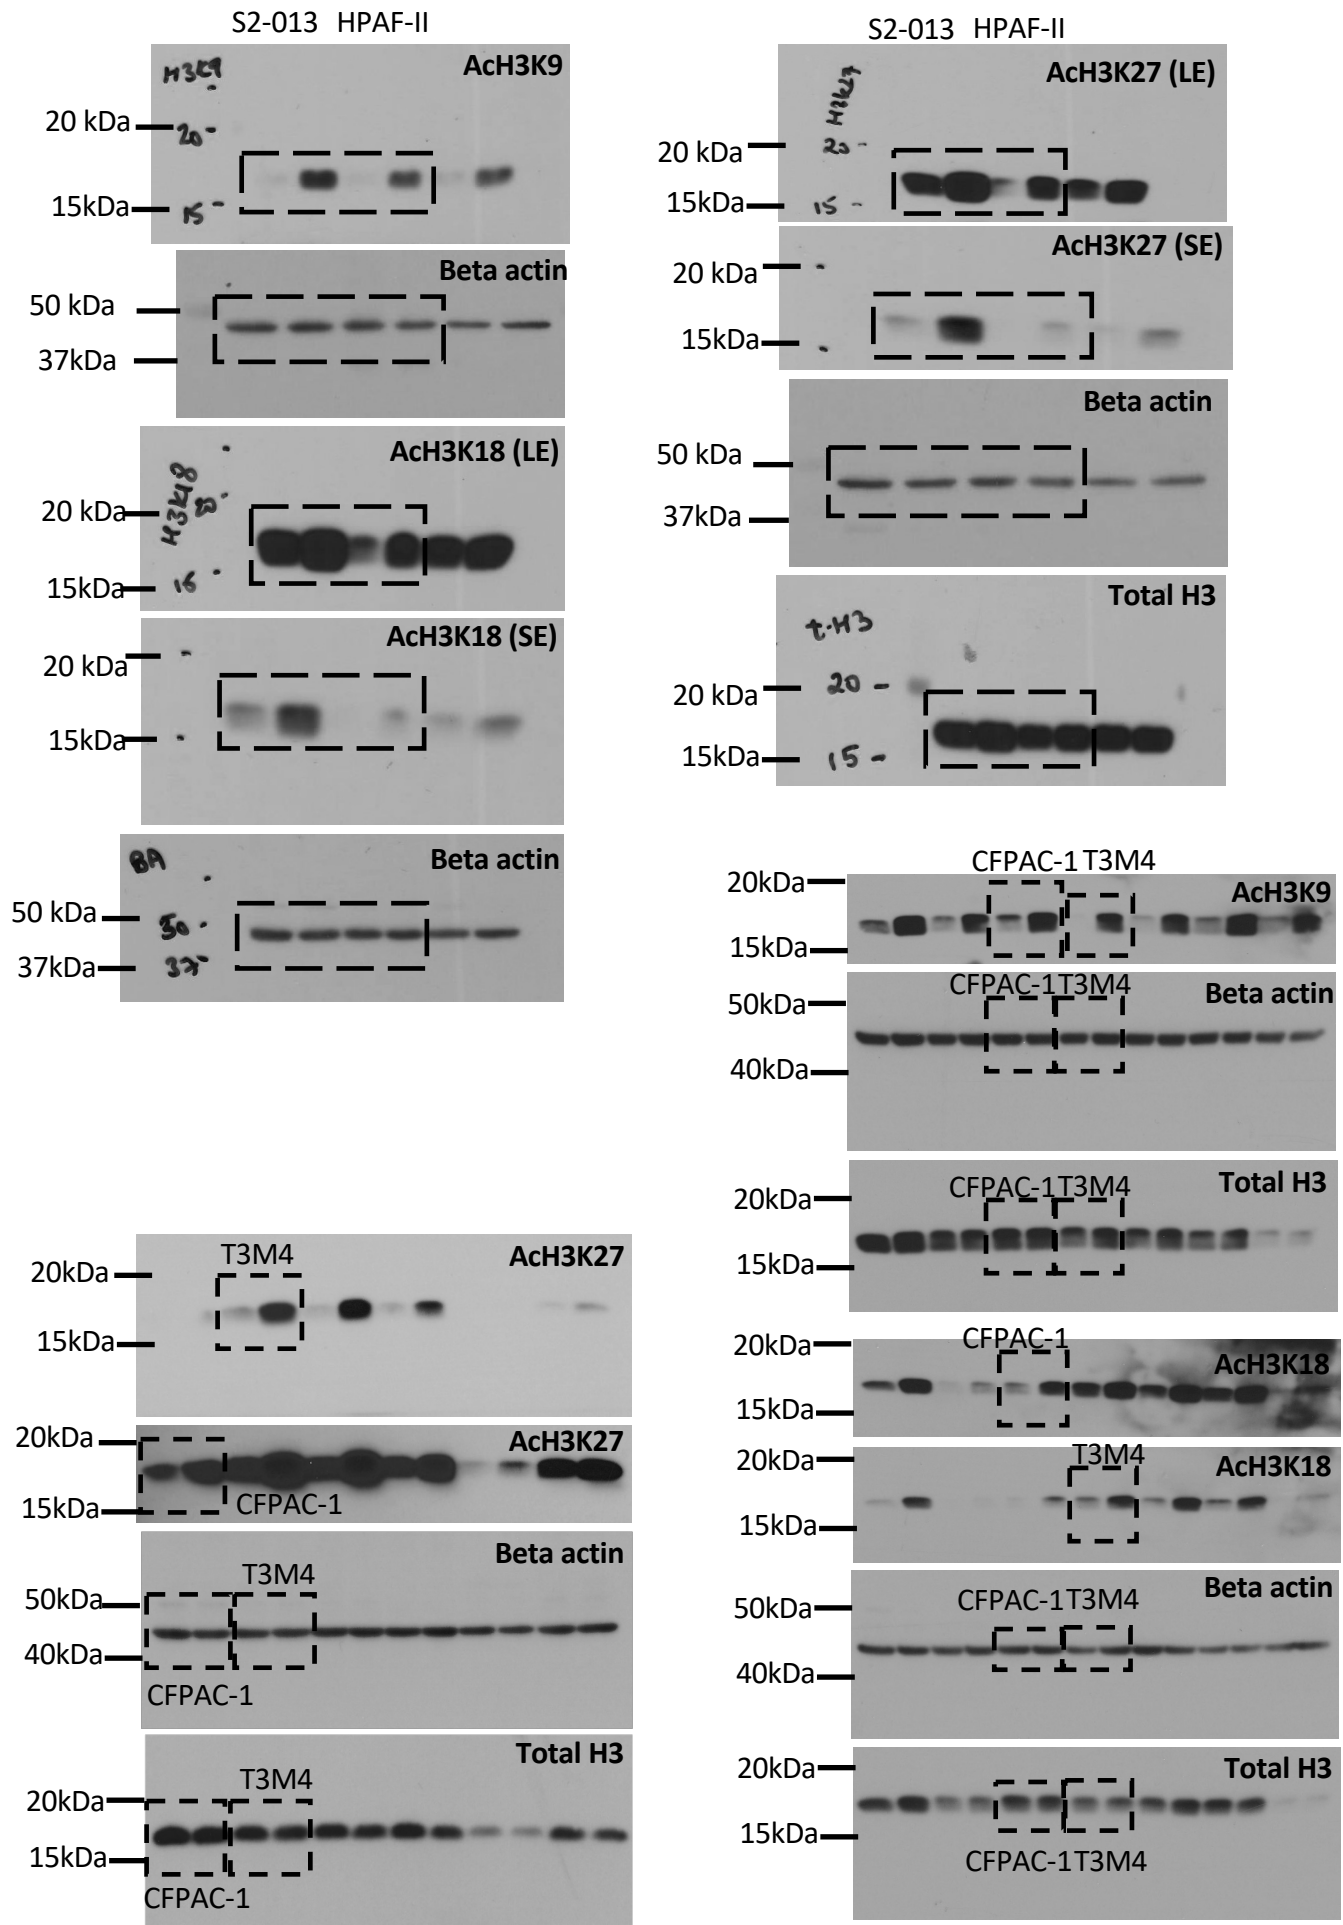

Unprocessed western blot for Fig. 2f

**S2-013**

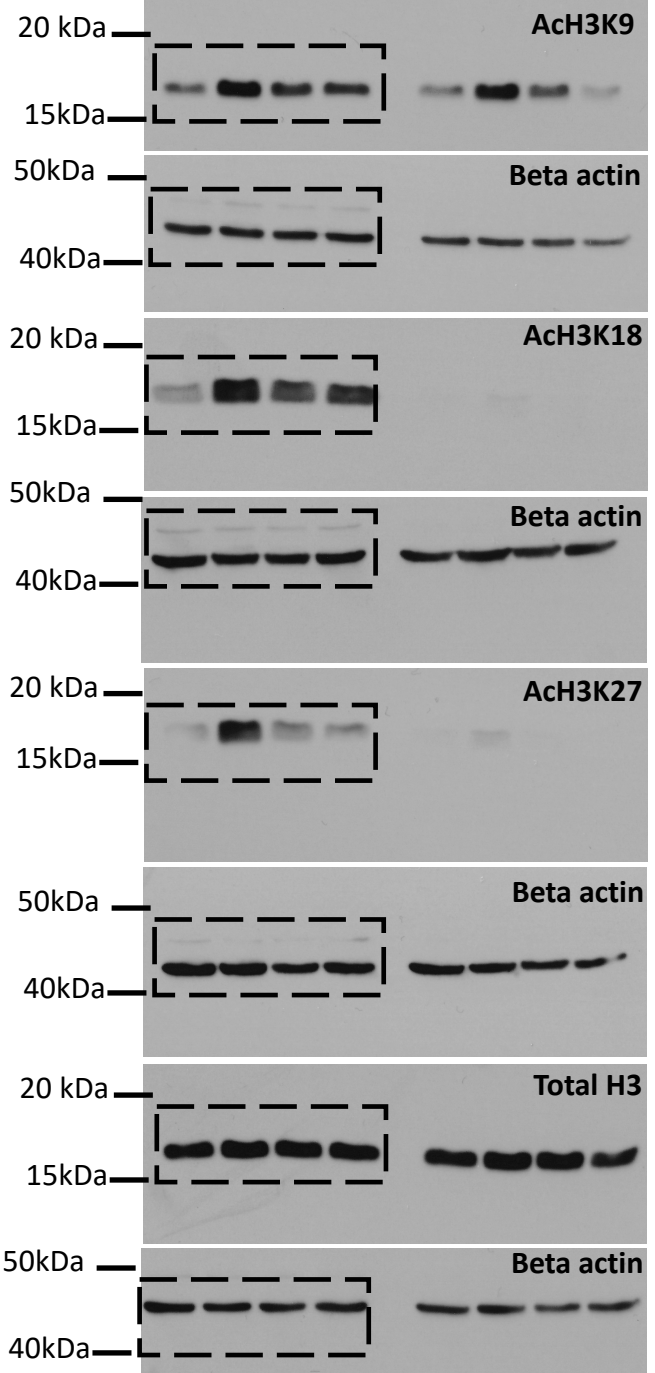

**HPAF-II**

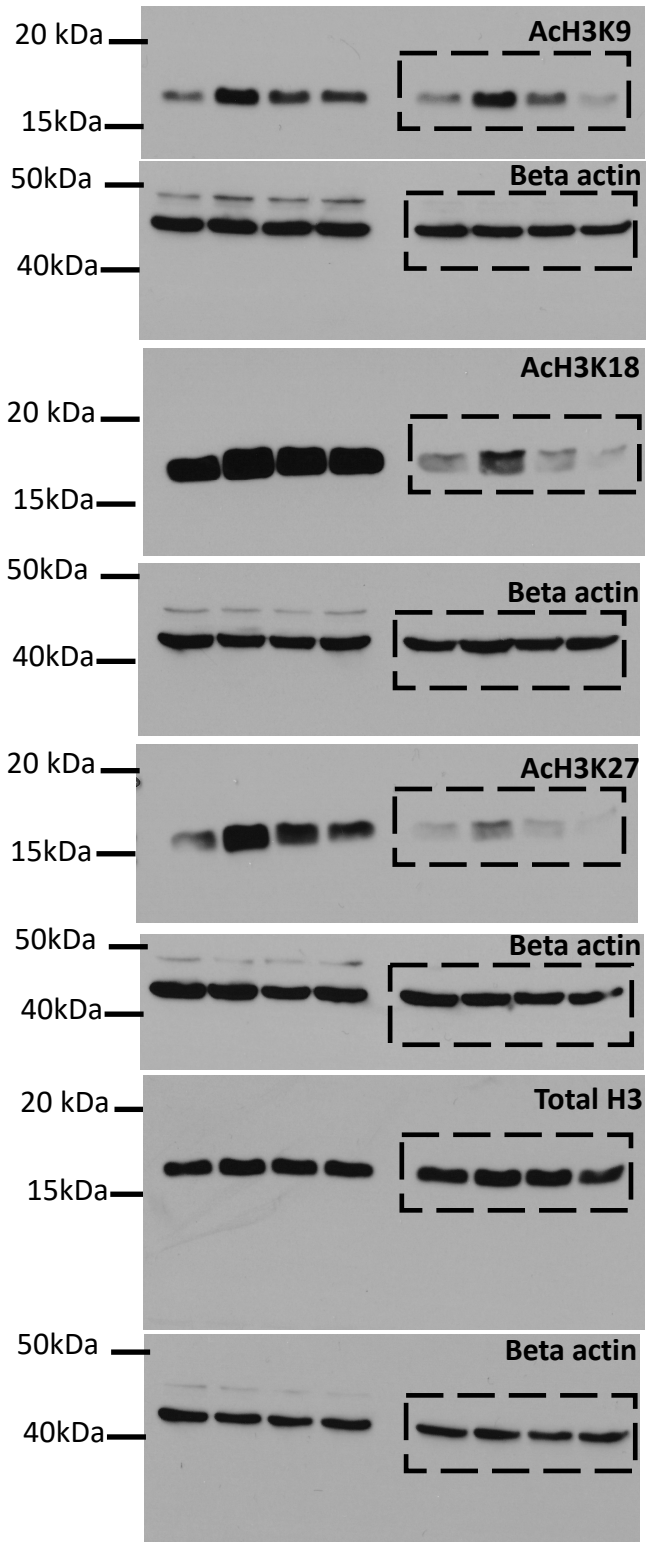

Unprocessed western blot for Fig. 2f (continued)

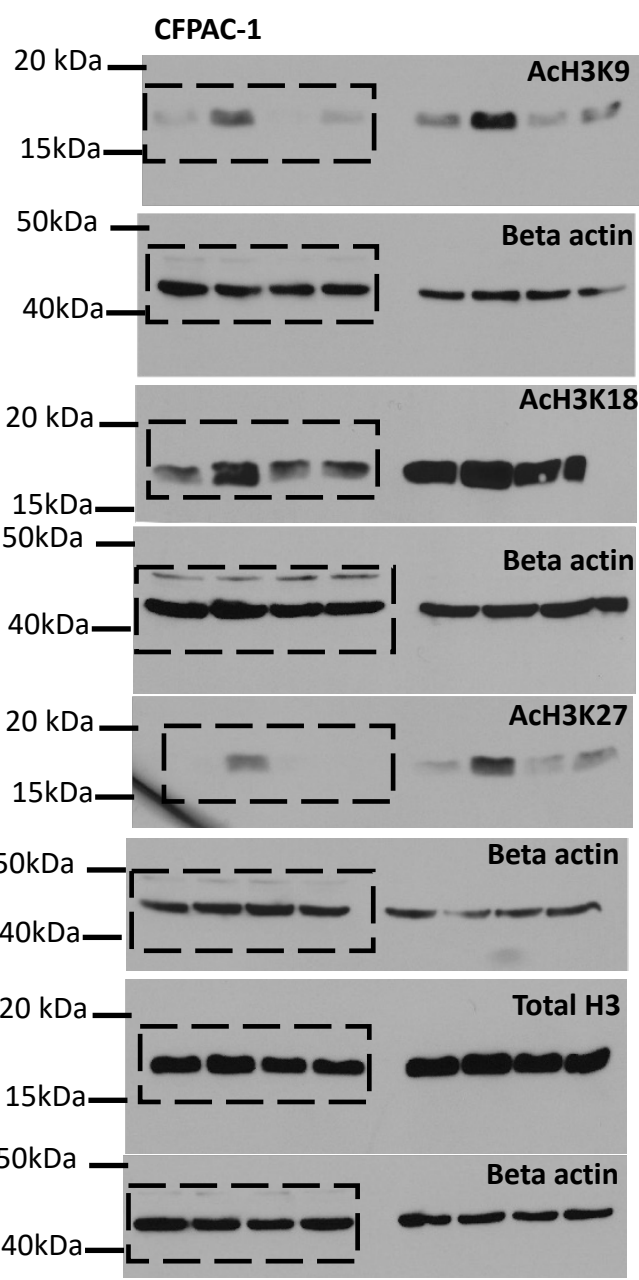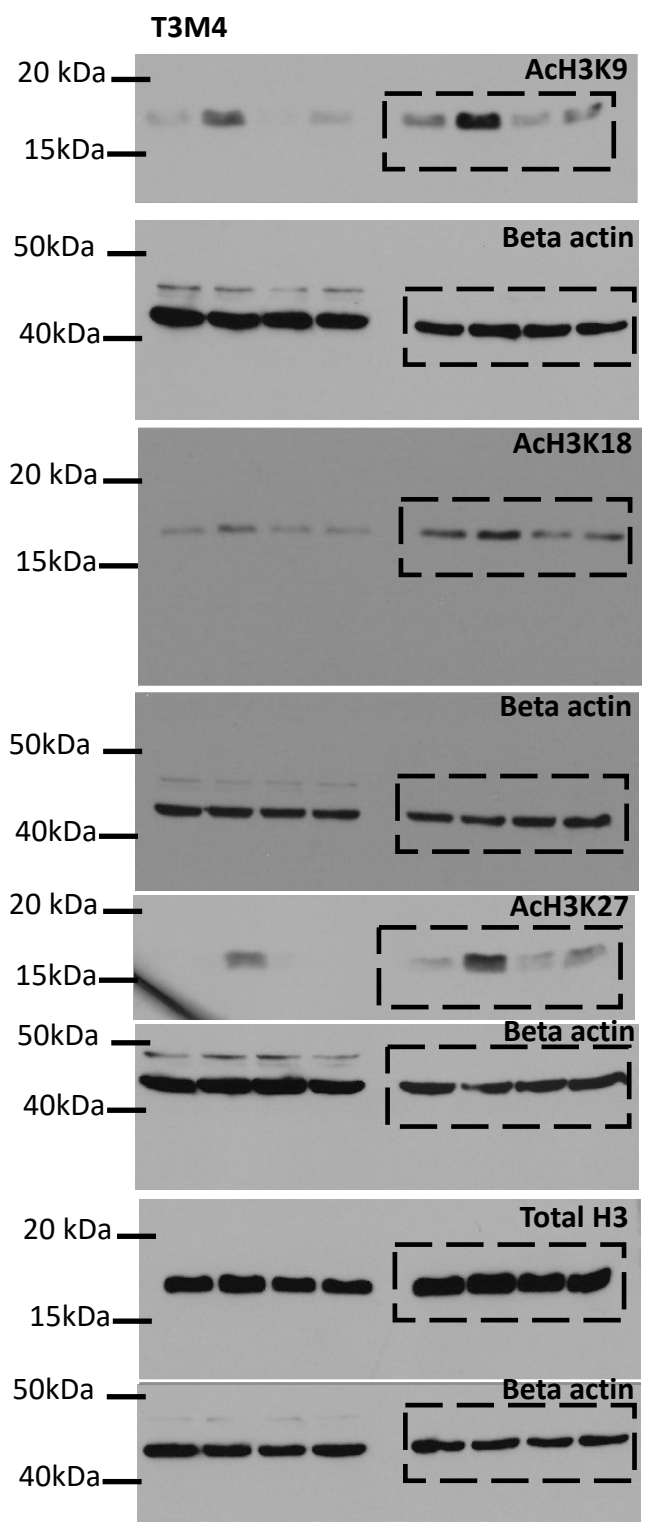

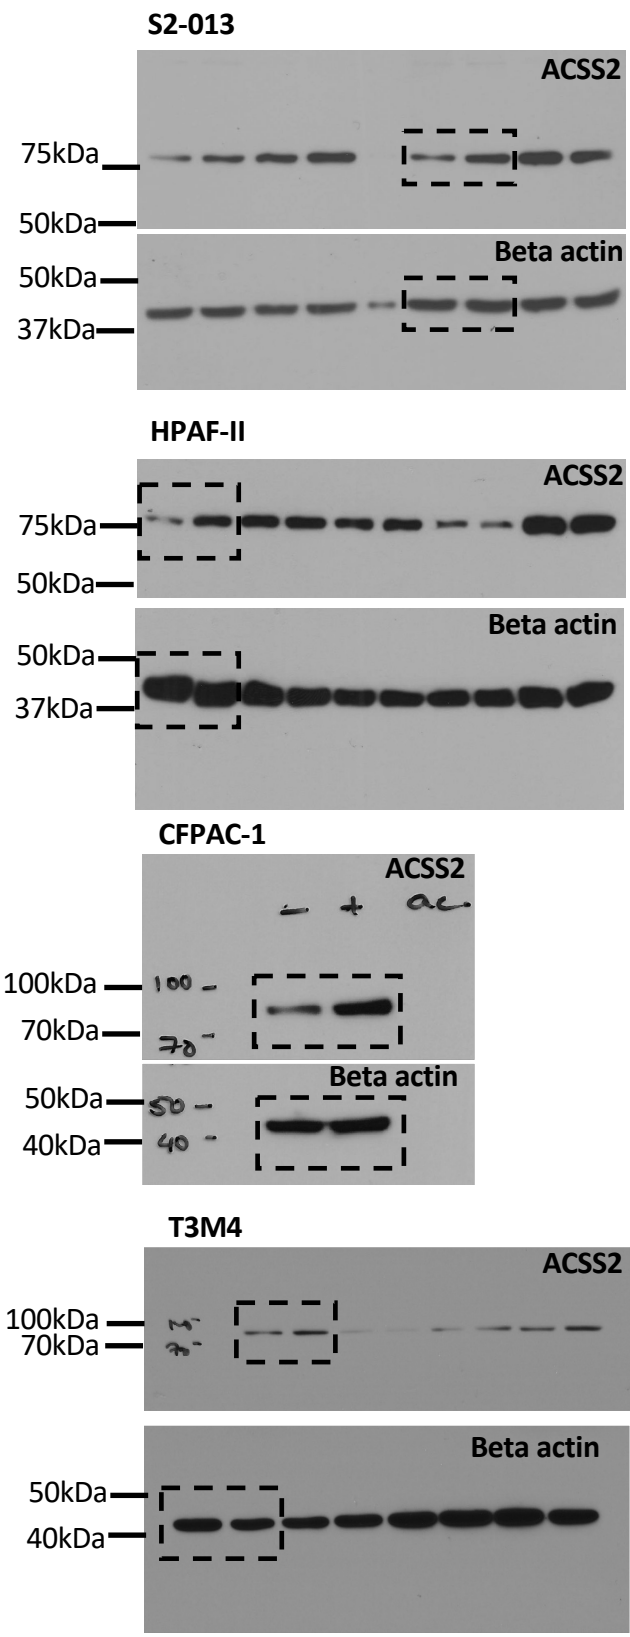

Supplement: 41556_2024_1372_MOESM7_ESM.pdf [file 41556_2024_1372_MOESM7_ESM.pdf]
