# Supplementary material
Source: PubMed Central journal article supplement (PMC11031407)

Unprocessed western blot for Fig. 4I

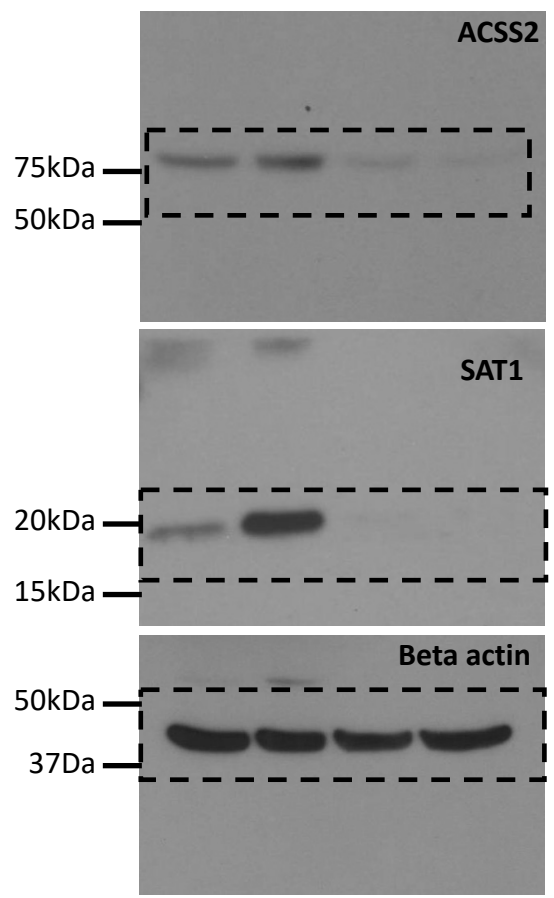

Supplement: 41556_2024_1372_MOESM11_ESM.pdf [file 41556_2024_1372_MOESM11_ESM.pdf]
