# Supplementary material
Source: PubMed Central journal article supplement (PMC11031407)

Unprocessed western blot for Fig. 6e

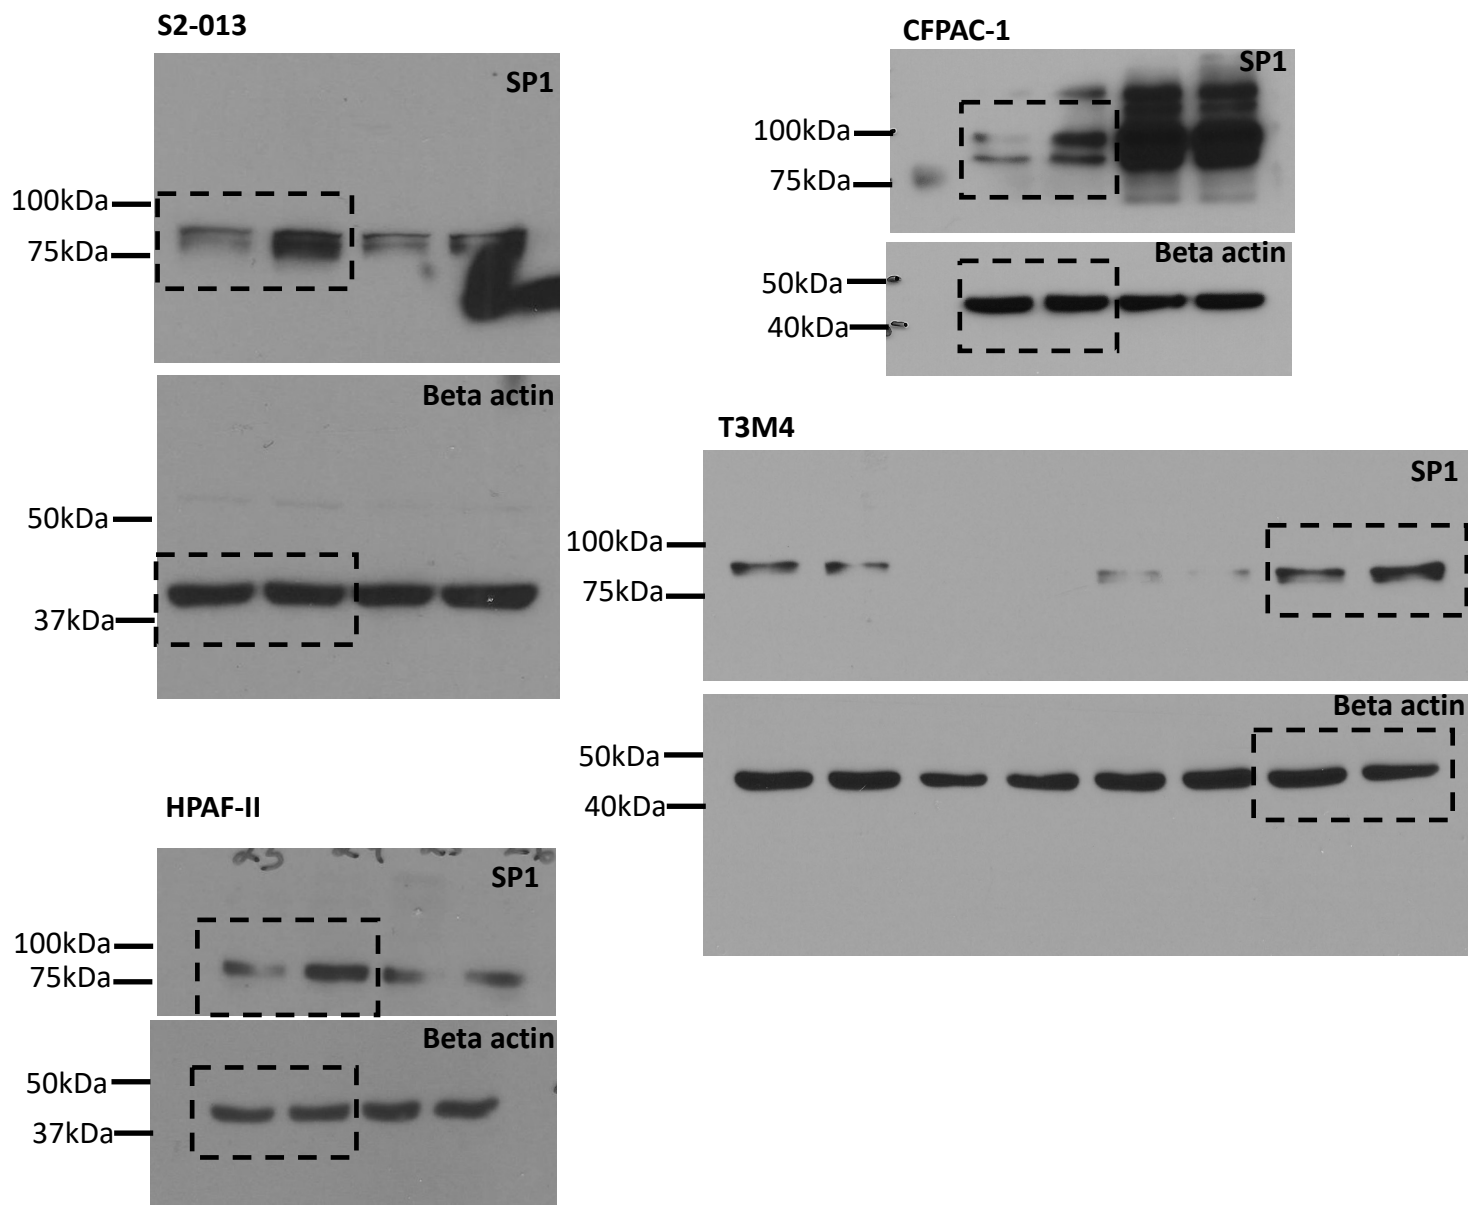

Unprocessed western blot for Fig. 6h

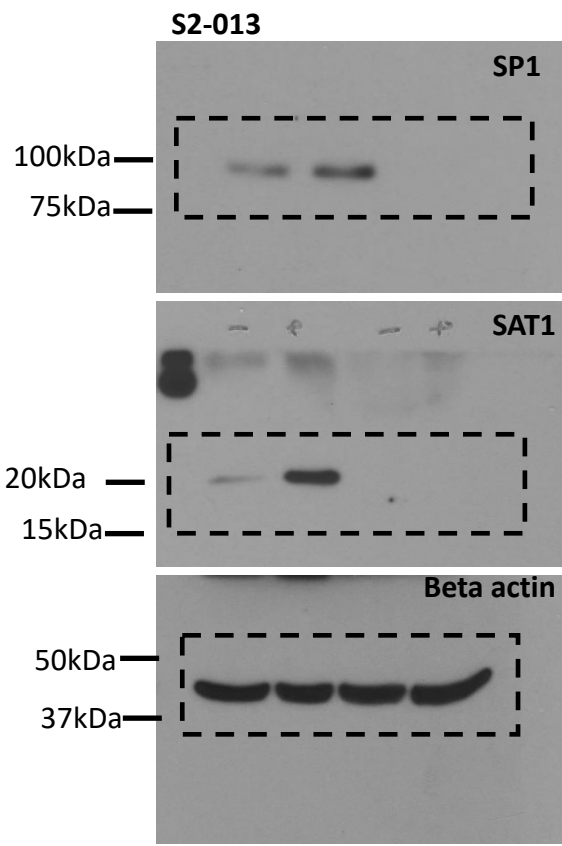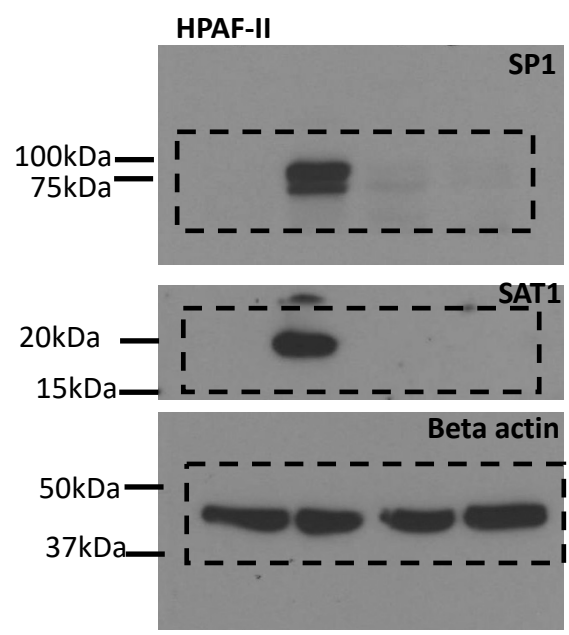

Unprocessed western blot for Fig. 6j

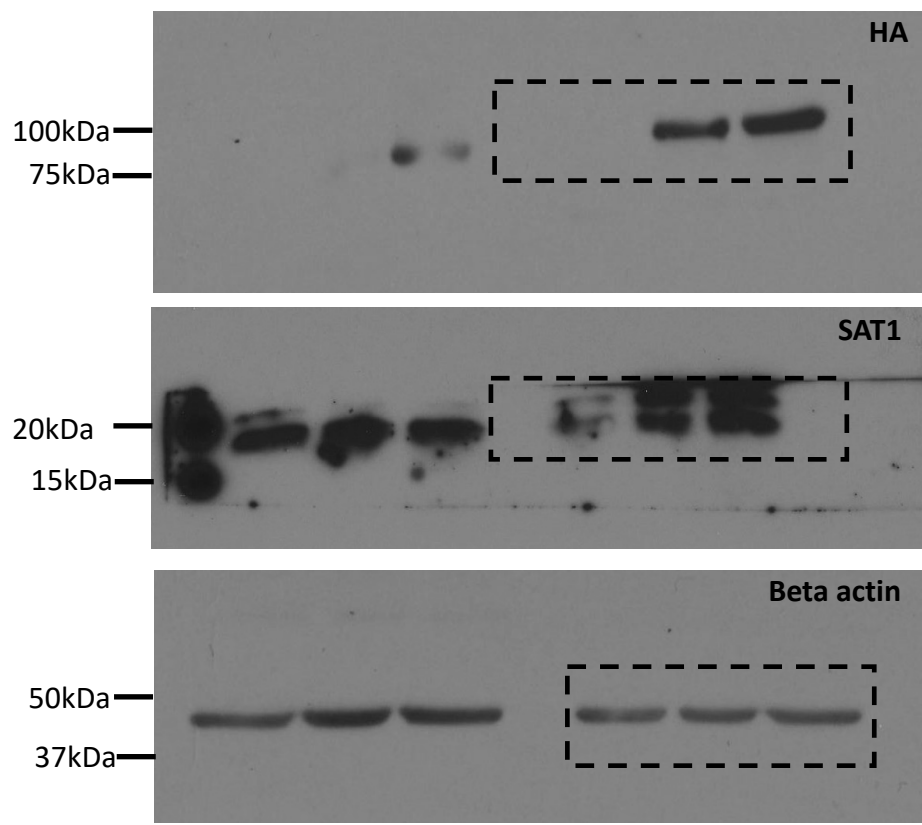

**S2-013**

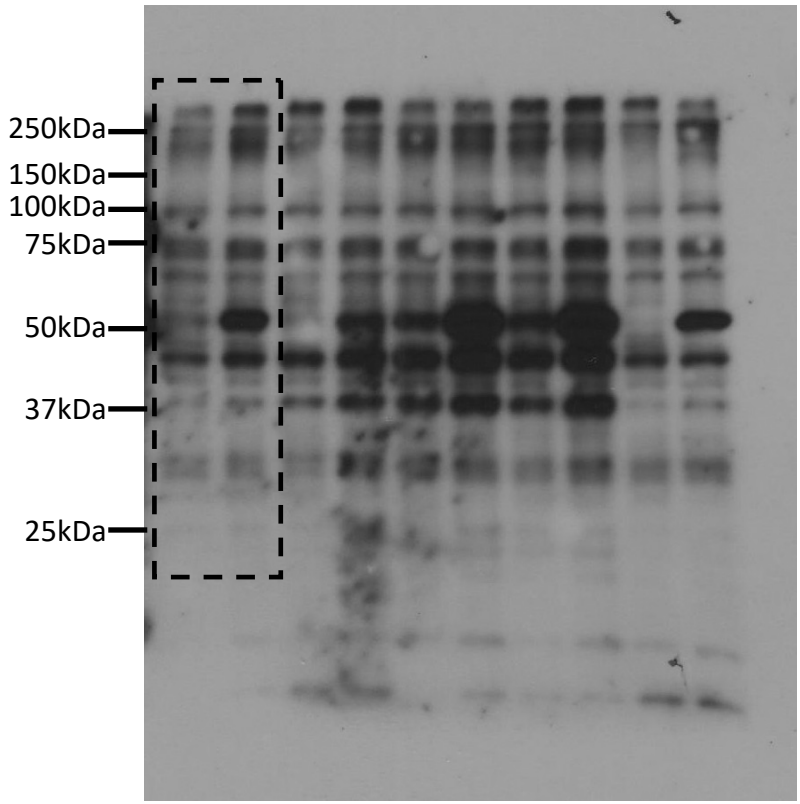

**HPAF-II**

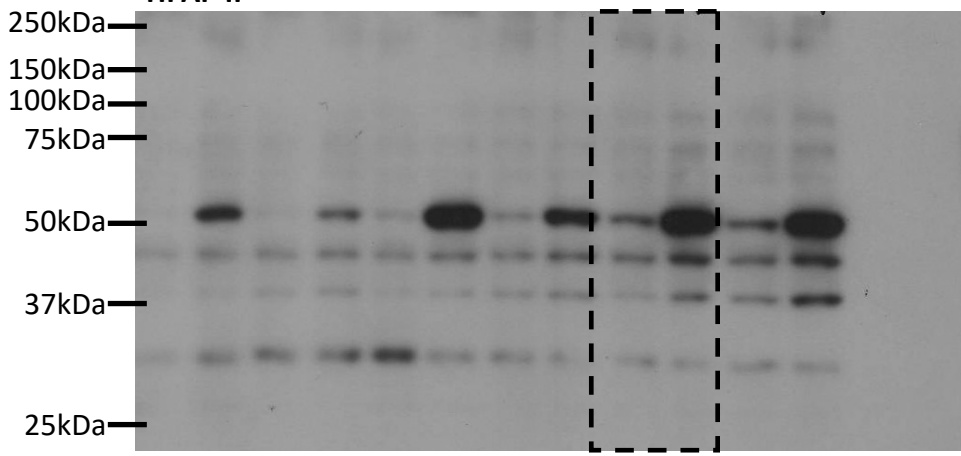

Unprocessed western blot for Fig. 6p

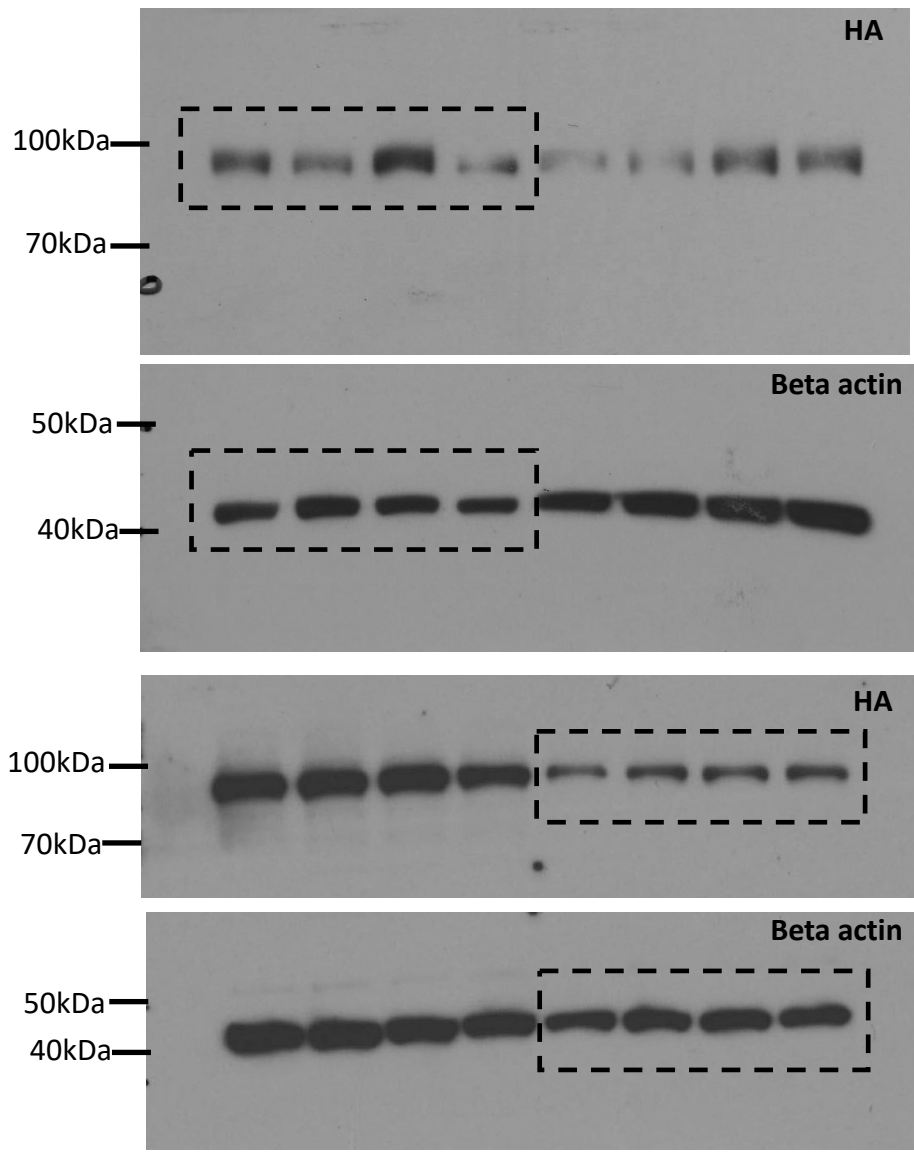

Supplement: 41556_2024_1372_MOESM15_ESM.pdf [file 41556_2024_1372_MOESM15_ESM.pdf]
