# Supplementary material
Source: PubMed Central journal article supplement (PMC11031407)

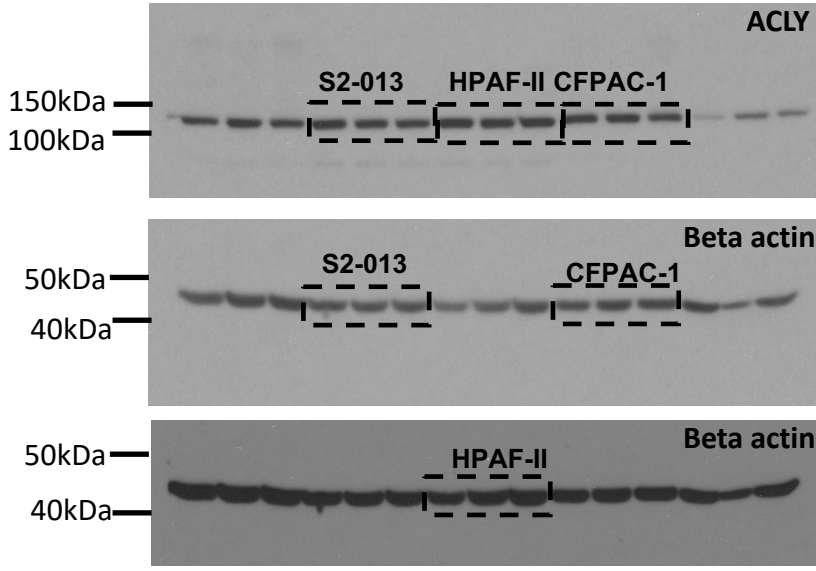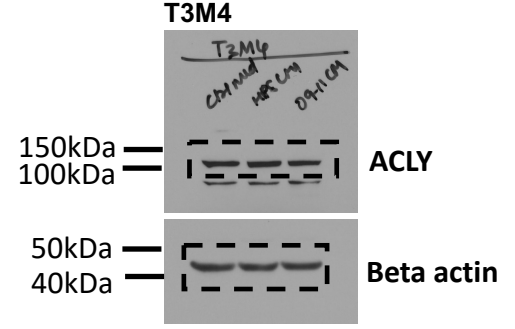

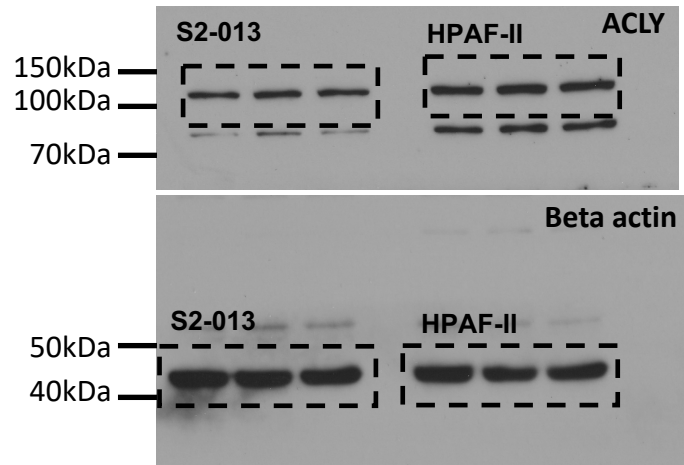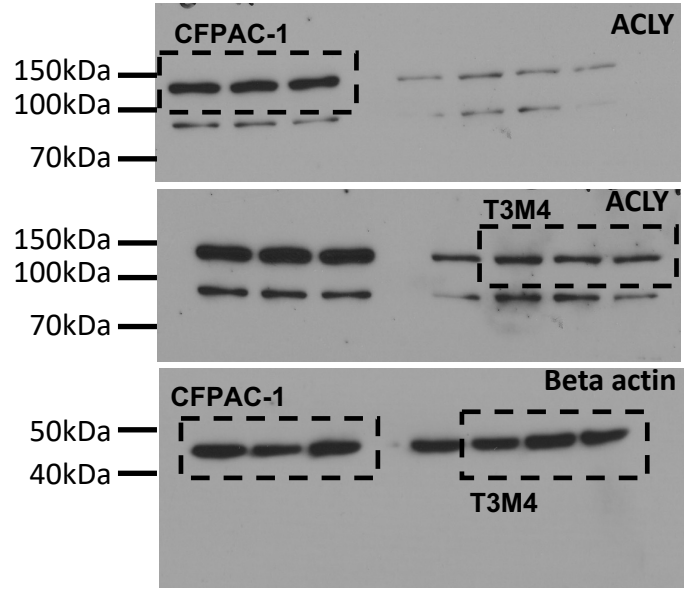

Supplement: 41556_2024_1372_MOESM19_ESM.pdf [file 41556_2024_1372_MOESM19_ESM.pdf]
