# Supplementary material
Source: PubMed Central journal article supplement (PMC11031407)

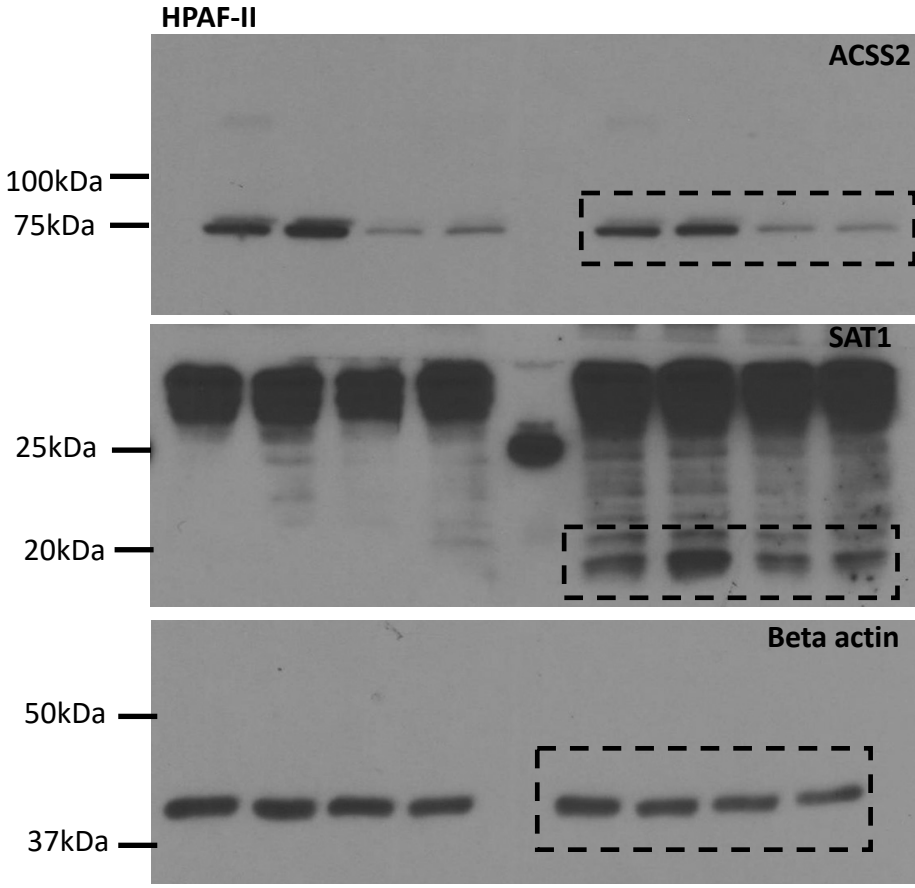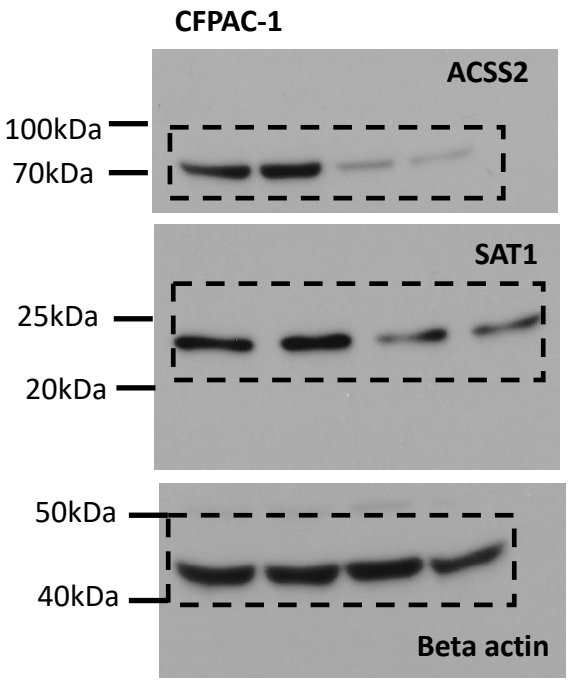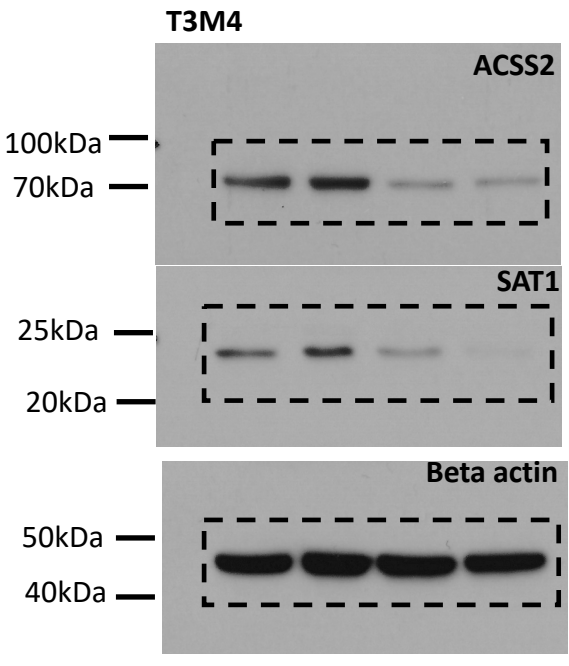

Supplement: 41556_2024_1372_MOESM27_ESM.pdf [file 41556_2024_1372_MOESM27_ESM.pdf]
