# Supplementary material
Source: PubMed Central journal article supplement (PMC11031407)

Unprocessed western blot for Extended Data Fig. 9e

**CFPAC-1**

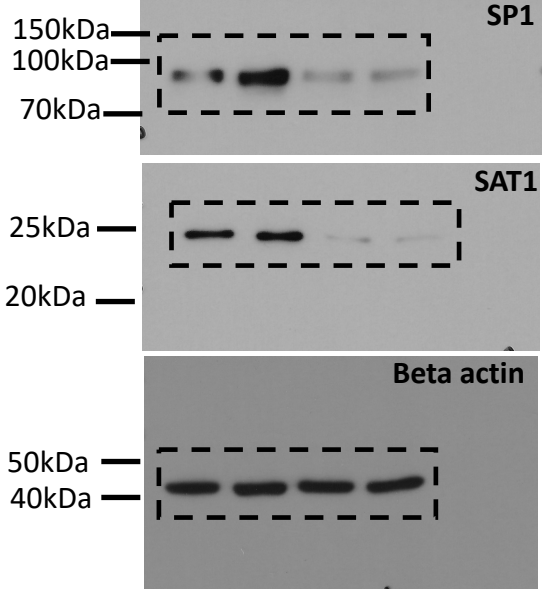

**T3M4**

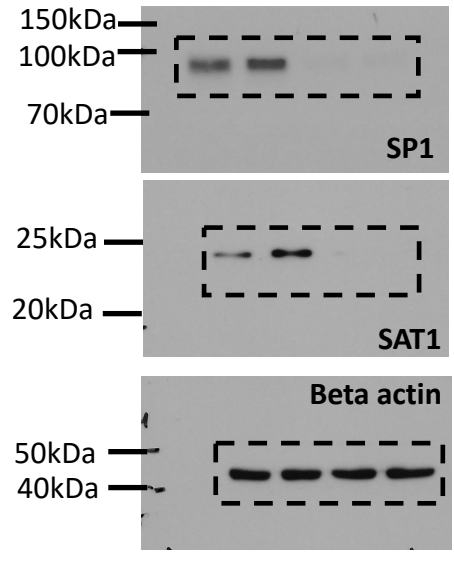

Unprocessed western blot for Extended Data Fig. 9g

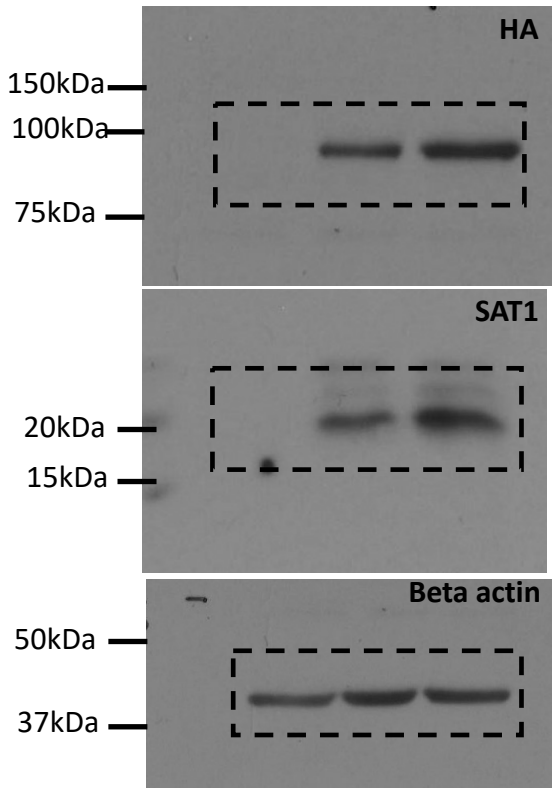

**S2-013**

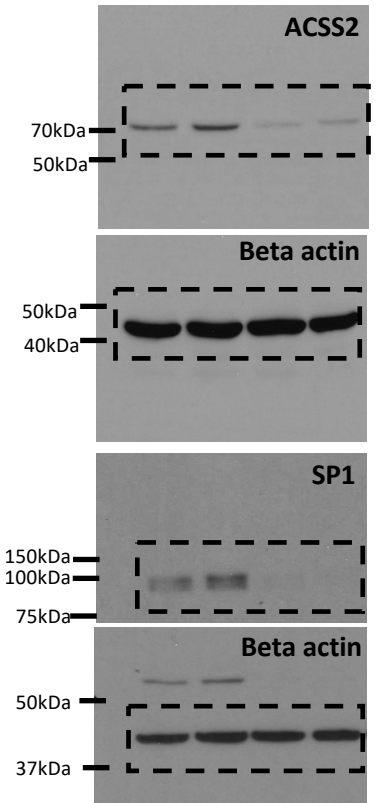

**HPAF-II**

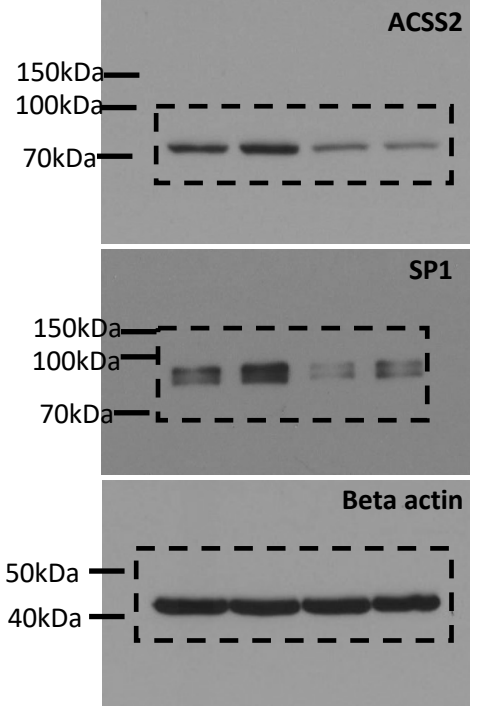

**CFPAC-1**

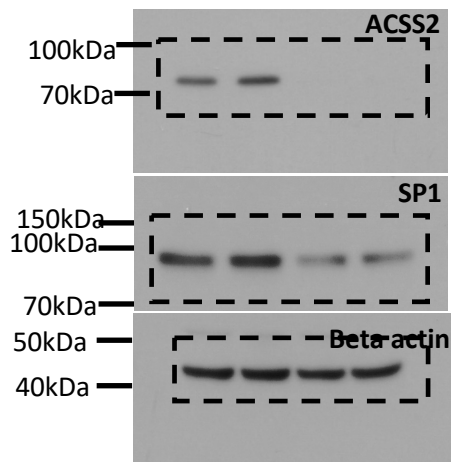

**T3M4**

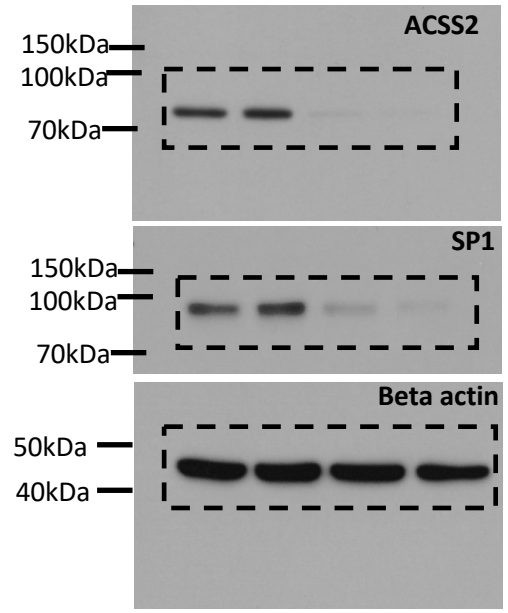

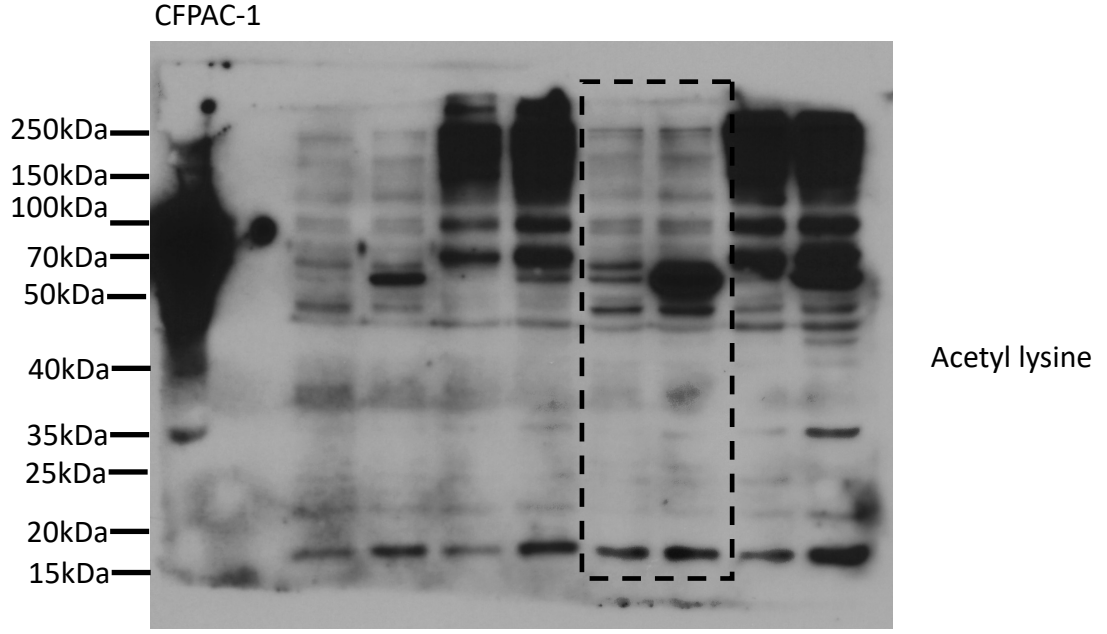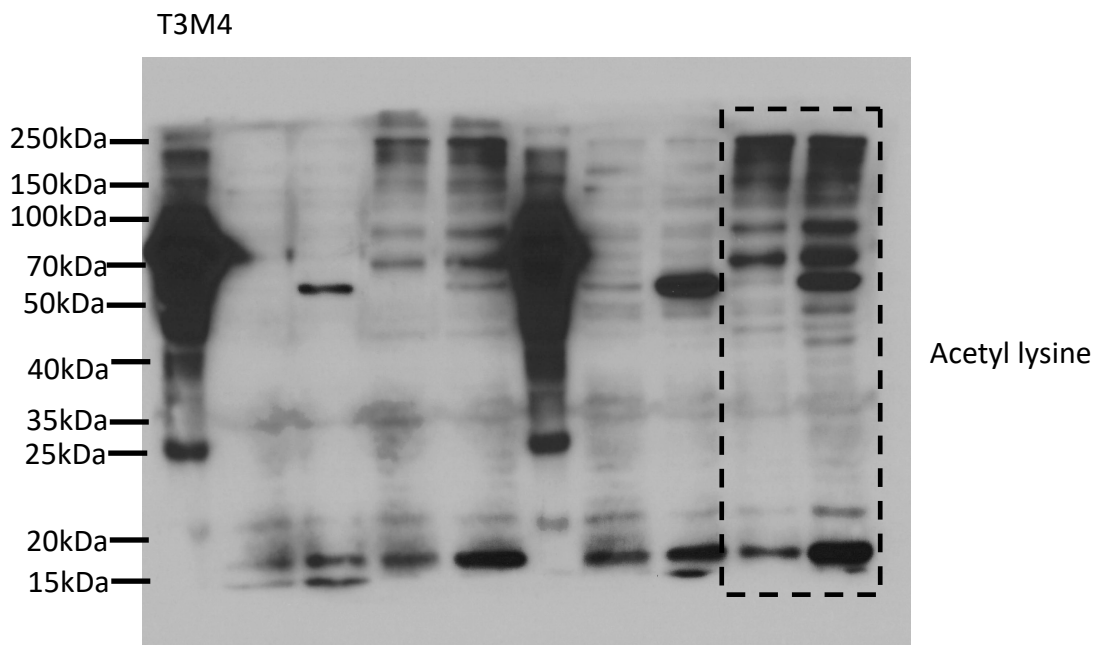

Supplement: 41556_2024_1372_MOESM29_ESM.pdf [file 41556_2024_1372_MOESM29_ESM.pdf]
